# Supplementary material for: Fabrication of a hierarchical structure by oxygen plasma etching of a photocured microstructure containing a silicon moiety
Source: Royal Society of Chemistry journal article supplement (doi:10.1039/c1jm12305j), 2011-01-01
Supplement: c1jm12305j.pdf [file c1jm12305j.pdf]

Supplementary Material (ESI) for Journal of Materials Chemistry

This journal is (c) The Royal Society of Chemistry 2011

## Supporting Information

### Fabrication of Hierarchical Structure by Oxygen Plasma Etching of Photo-Cured Microstructure Containing Silicon Moiety

Se-Jin Choi<sup>a</sup>, Moon Kee Choi<sup>b</sup>, Dongha Tahk<sup>a,c</sup>, Hyunsik Yoon<sup>\*b</sup>

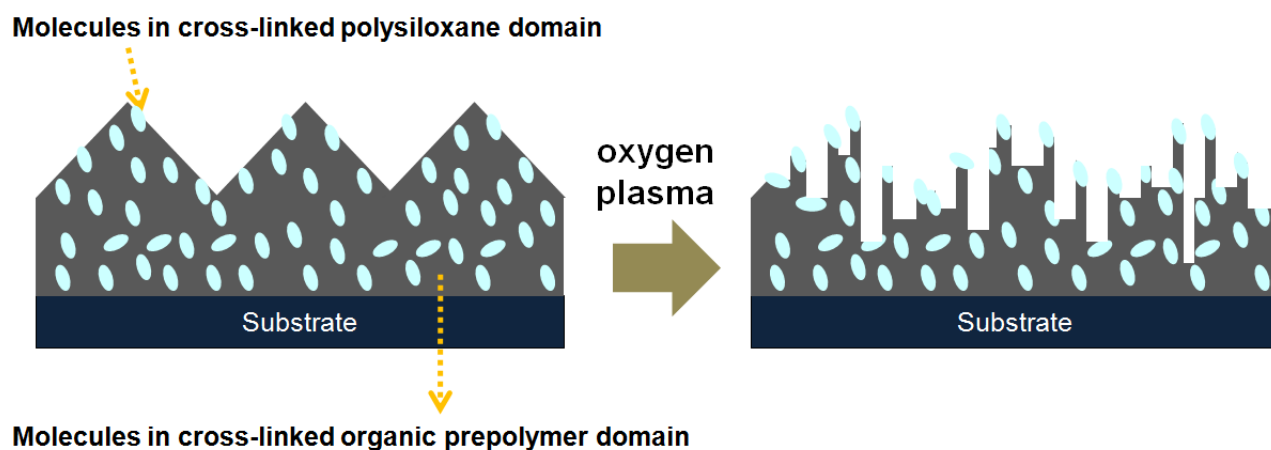

**Figure S1.** Schematic illustration for explaining the mechanism of the selective etching process to realize hierarchical structures.
